# Supplementary material for: Vaspin Alleviates Sepsis-Induced Cardiac Injury and Cardiac Inflammation by Inhibiting Kallikrein 7 in Mice
Source: Hindawi journal article supplement (doi:10.1155/2022/1149582), 2022-07-15
Supplement: f1 [file 1149582.f1.pdf]

## Supplemental materials

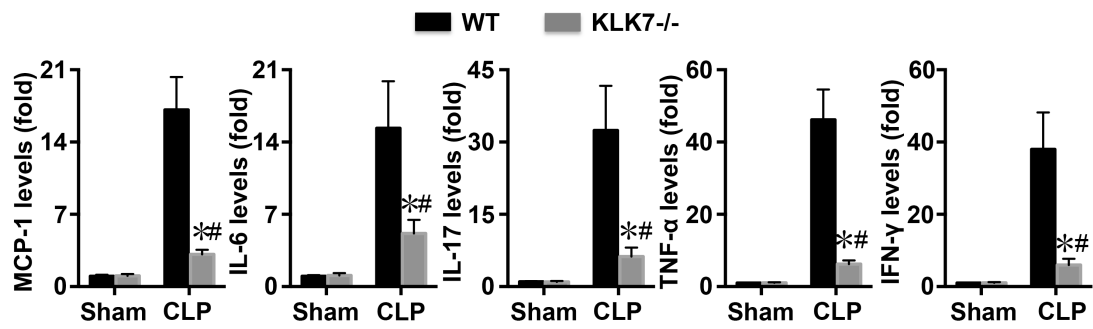

**Supplemental S1:** Effects of KLK7 deletion on sepsis-induced cardiac inflammation. mRNA expression levels of MCP-1, IL-6, IL-17, TNF- $\alpha$ , and IFN- $\gamma$  were detected. N = 6 in each group. \*  $p < 0.05$  vs. the CLP + WT group. #  $p < 0.05$  vs. the Sham + KLK7-/- group.
